# Supplementary material for: Low-temperature growth of ultrathin and epitaxial Mo2C nanosheets via a vapor–liquid–solid process
Source: Royal Society of Chemistry journal article supplement (doi:10.1039/d2nr02389j), 2022-01-01
Supplement: d2nr02389j1.pdf [file d2nr02389j1.pdf]

## **Low-Temperature Growth of Ultrathin and Epitaxial Mo<sub>2</sub>C nanosheets via the Vapor-Liquid-Solid Process**

Bin Wang<sup>a,b,\*</sup>, Changbao Zhao<sup>a</sup>, Chao Wang<sup>a</sup>, Rongtan Li<sup>a</sup>, Guohui Zhang<sup>a</sup>, Rentao  
Mu<sup>a</sup>, Qiang Fu<sup>a</sup>

<sup>a</sup> State Key Laboratory of Catalysis, Dalian Institute of Chemical Physics, Chinese  
Academy of Sciences, Dalian, 116023, China

<sup>b</sup> College of Chemistry and Materials Engineering, Bohai University, Jinzhou, 121013,  
China

\*Corresponding author.

*E-mail address:* wangbinlhx@163.com (B. Wang).

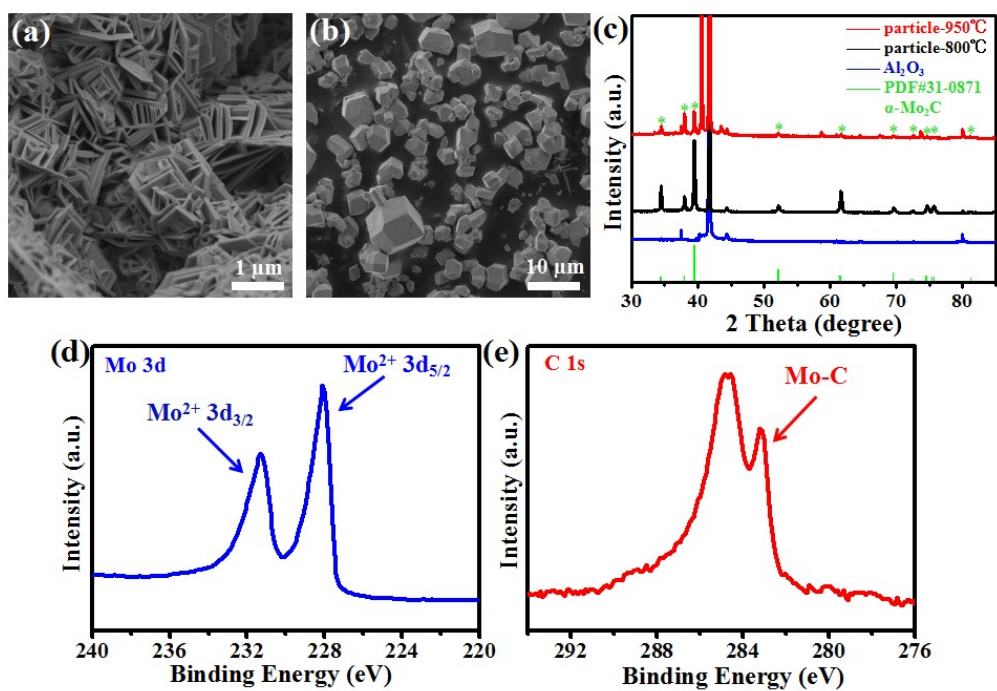

**Figure S1** (a) and (b) SEM images of the MoC<sub>x</sub> crystals grown at 800 and 950 °C, respectively. (c) The corresponding XRD patterns of the MoC<sub>x</sub> crystals. (d) and (e) XPS spectra acquired at the Mo 3d and C 1s regions.

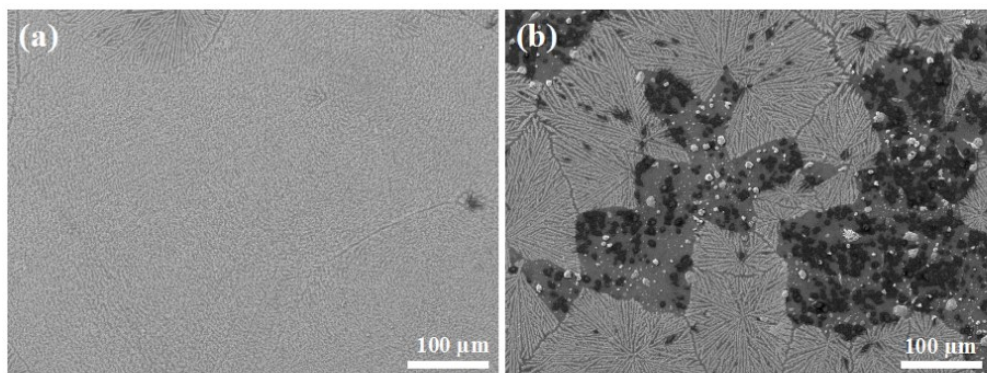

**Figure S2** SEM images of the spin-coated Na<sub>2</sub>MoO<sub>4</sub> aqueous solution on the Al<sub>2</sub>O<sub>3</sub>(0001) with (a) or without (b) O<sub>2</sub> plasma.

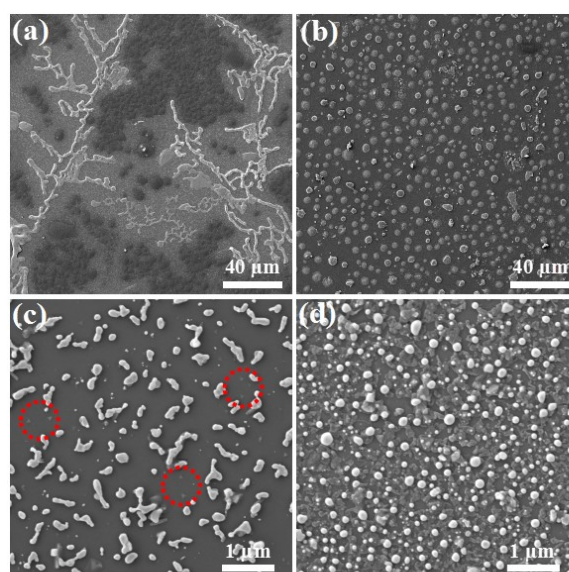

**Figure S3** SEM images of the spin-coated  $\text{Na}_2\text{MoO}_4$  aqueous solution at 800 °C (a) without annealing, (b) with an annealing process for 20 min. (c) and (d) SEM images of the  $\text{Mo}_2\text{C}$  crystals grown at 1000 and 1100 °C, respectively.
